# Supplementary material for: Effect of Unsaturated Sn Atoms on Gas-Sensing Property in Hydrogenated SnO2 Nanocrystals and Sensing Mechanism
Source: PubMed Central journal article supplement (PMC5430629; doi:10.1038/s41598-017-00891-5), 2017-04-27
Supplement: 41598_2017_891_MOESM1_ESM.pdf [file 41598_2017_891_MOESM1_ESM.pdf]

## Supporting Information

**Title:** Effect of Unsaturated Sn Atoms on Gas-Sensing Property in Hydrogenated SnO<sub>2</sub> Nanocrystals and Sensing Mechanism

Yukun Yuan<sup>1</sup>, Ye Wang<sup>1</sup>, Miao Wang<sup>1</sup>, Junfang Liu<sup>1</sup>, Cuijin Pei<sup>1</sup>, Bin Liu<sup>1</sup>, Hua Zhao<sup>1</sup>, Shengzhong (Frank) Liu<sup>2</sup> and Heqing Yang<sup>1\*</sup>

Y. Yuan, Y. Wang, M. Wang, J. Liu, C. Pei, B. Liu, H. Zhao, Prof. S. Liu, Prof. H. Yang

<sup>1</sup>Shaanxi Key Laboratory for Advanced Energy Devices; Shaanxi Engineering Laboratory for Advanced Energy Technology; Key Laboratory of Macromolecular Science of Shaanxi Province, School of Materials Science and Engineering, Shaanxi Normal University, Xi'an, 710119, China  
E-mail:hqyang@snnu.edu.cn

Prof. Shengzhong (Frank) Liu

<sup>2</sup>Key Laboratory of Applied Surface and Colloid Chemistry, National Ministry of Education; Shaanxi Key Laboratory for Advanced Energy Devices; Shaanxi Engineering Lab for Advanced Energy Technology, School of Materials Science and Engineering, Shaanxi Normal University, Xi'an 710119, China

Supplementary Figure 1

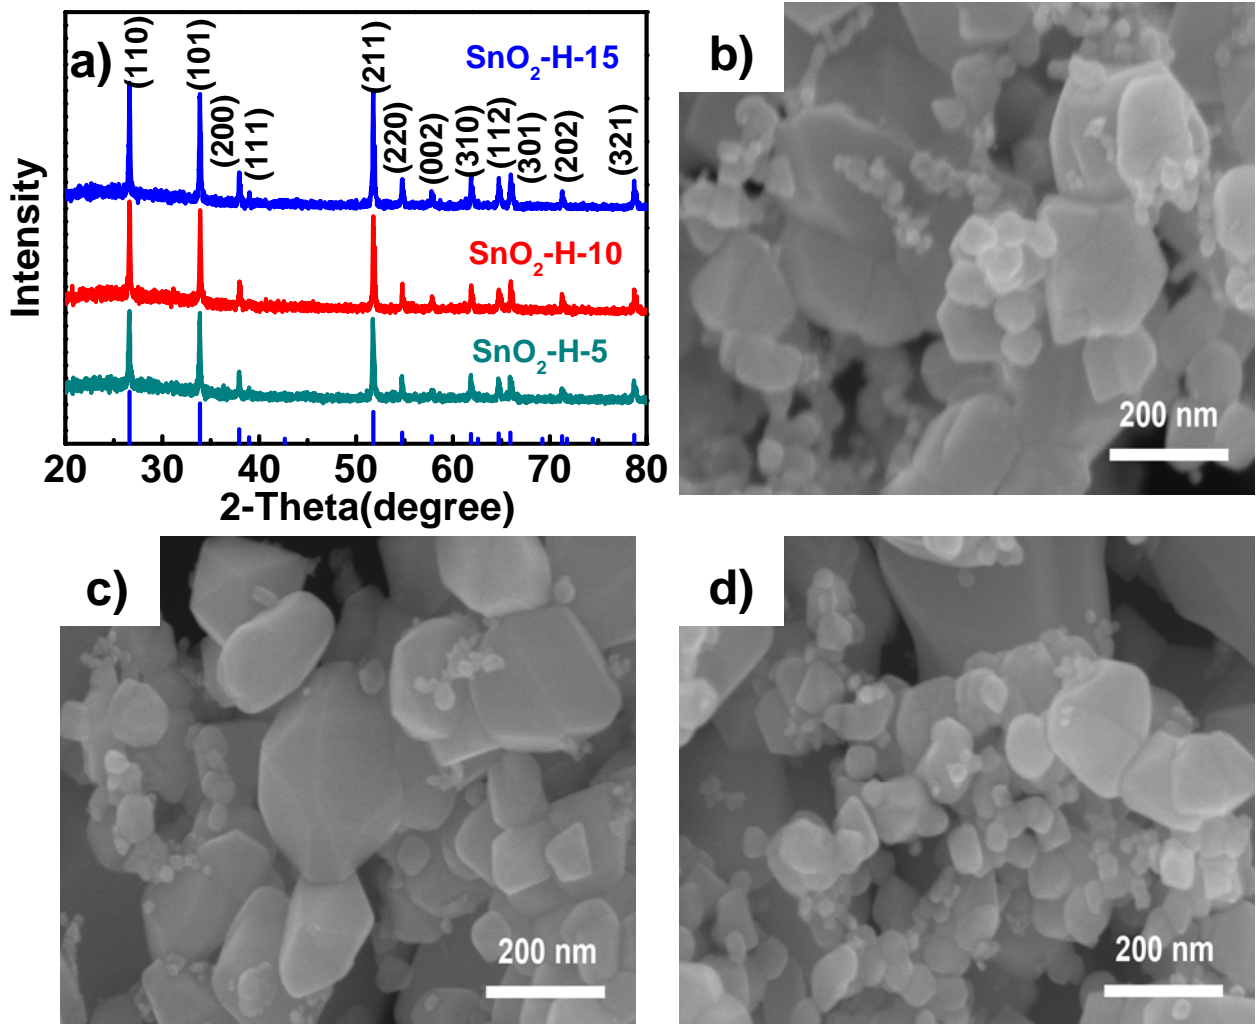

Supplementary Figure 1 | (a) XRD patterns and (b-d) FESEM images of the SnO<sub>2</sub>-H-5, SnO<sub>2</sub>-H-10 and SnO<sub>2</sub>-H-15.

Supplementary Figure 2

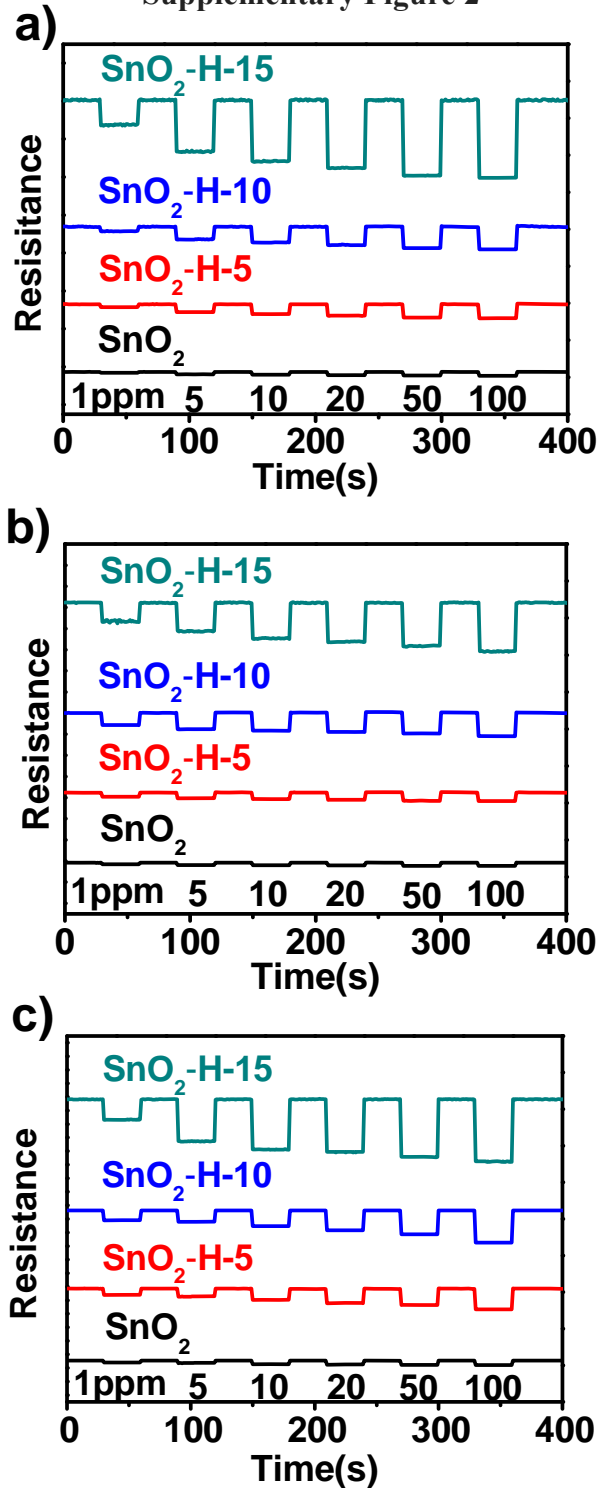

Supplementary Figure 2 | Transient response and recovery curves of the sensors based on the hydrogenated and non-hydrogenated SnO<sub>2</sub> samples to different concentrations of (a) ethanol, (b) methanol and (c) triethylamin with 50% of relative humidity at 350°C.

Supplementary Figure 3

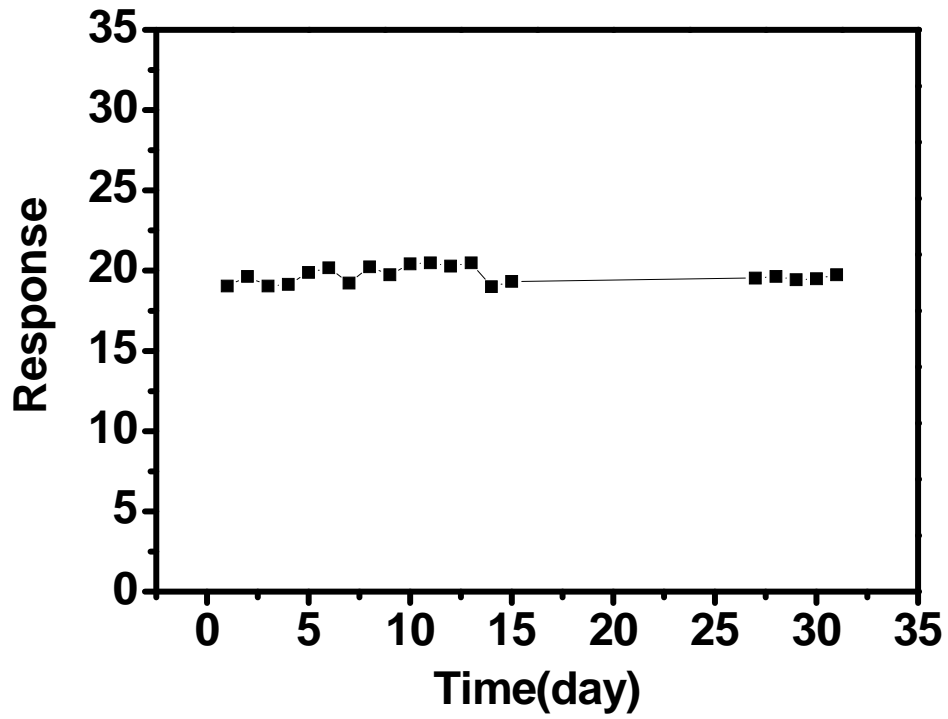

Supplementary Figure 3 | Long-term stability of the sensor based on the SnO<sub>2</sub>-H-15 sample to 100 ppm ethanol with 3%-35% of relative humidity at 350°C.

### Supplementary Table 1

**Supplementary Table 1 | Fitting result of O 1s XPS spectra of the hydrogenated and non-hydrogenated SnO<sub>2</sub> samples.**

| SnO <sub>2</sub> sample |                         | O <sub>L</sub> (Sn-O) | O <sub>V</sub> (vacancy) | O <sub>C</sub> (chemisorbed) and -OH |
|-------------------------|-------------------------|-----------------------|--------------------------|--------------------------------------|
| SnO <sub>2</sub>        | binding energy (eV)     | 530.27                | 531.44                   | 532.85                               |
|                         | relative percentage (%) | 41.59                 | 37.79                    | 20.61                                |
| SnO <sub>2</sub> -H-5   | binding energy (eV)     | 530.33                | 531.56                   | 533.00                               |
|                         | relative percentage (%) | 40.52                 | 37.98                    | 21.50                                |
| SnO <sub>2</sub> -H-10  | binding energy (eV)     | 530.22                | 531.42                   | 532.92                               |
|                         | relative percentage (%) | 34.85                 | 41.20                    | 23.95                                |
| SnO <sub>2</sub> -H-15  | binding energy (eV)     | 530.22                | 531.52                   | 532.97                               |
|                         | relative percentage (%) | 32.15                 | 42.14                    | 25.71                                |
